# Supplementary material for: Differential response of patient-derived primary glioblastoma cells to environmental stiffness
Source: PubMed Central journal article supplement (PMC4800394; doi:10.1038/srep23353), 2016-03-21
Supplement: srep23353-s1.pdf [file srep23353-s1.pdf]

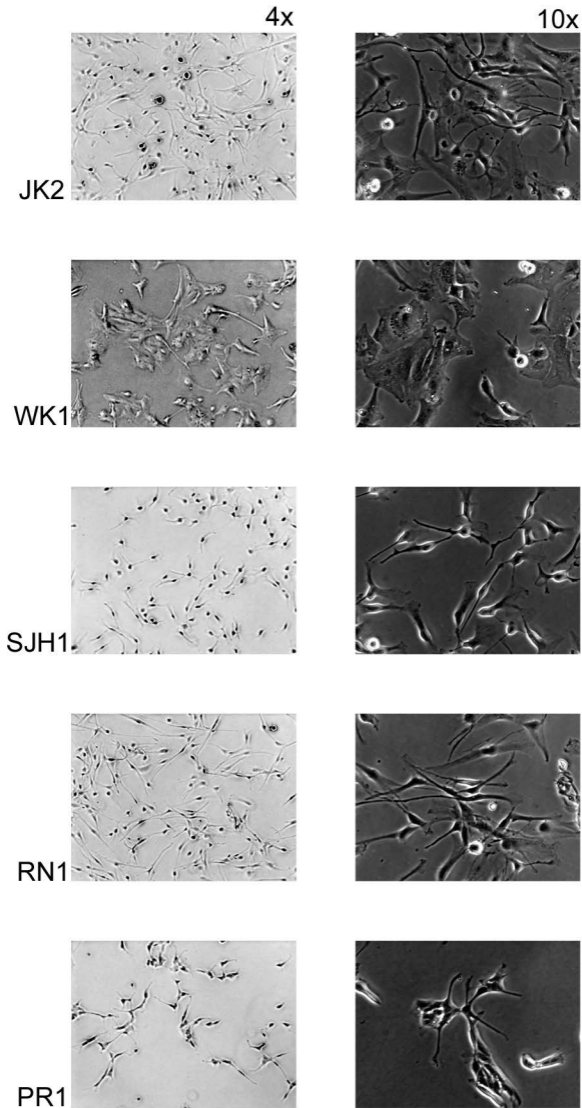

Supplementary Figure 1. Bright field images (4x and 10x magnification) of early passages of the indicated primary GBM cell lines.

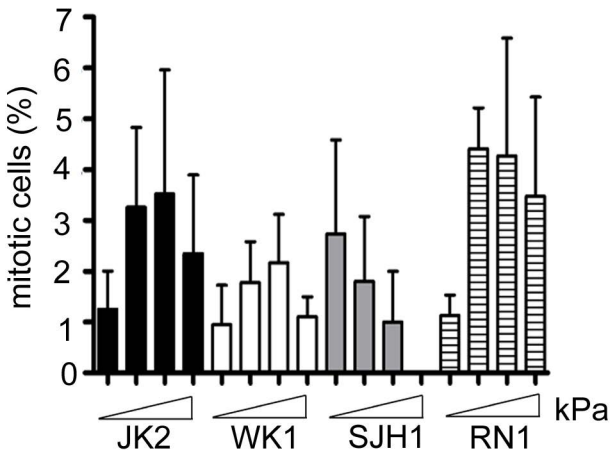

Supplementary Figure 2. The percentage of cells undergoing mitosis throughout the course of the time-lapse videos of the indicated cell lines on the PAM gels of increasing stiffness. There was no significant difference in the percentage of cells in each cell line, one-way ANOVA.

Supplementary Table S1: Characteristics of primary patient-derived glioblastoma (GBM) lines. Molecular subclass was determined by gene expression as previously described<sup>14</sup>. ND = not determined.

| Cell line | Sex | Age | Tumour location             | Survival (days) | Molecular Subclass |
|-----------|-----|-----|-----------------------------|-----------------|--------------------|
| JK2       | M   | 75  | right frontal GBM           | 178             | proneural          |
| WK1       | M   | 77  | right parieto-occipital GBM | 121             | mesenchymal        |
| SJH1      | M   | 72  | left temporal GBM           | 45              | neural             |
| RN1       | M   | 56  | left temporal GBM           | 243             | classical          |
| PR1       | M   | 75  | right occipital GBM         | 523             | ND                 |
